# Supplementary material
Source: PubMed Central journal article supplement (PMC3742490)

## **Supplemental Material to:**

**Shu Wen Wen, Eleanor I. Ager and Christopher Christophi**

**Bimodal role of Kupffer cells during colorectal cancer liver  
metastasis**

**Cancer Biology & Therapy 2012; 14(7)**

**<http://dx.doi.org/10.4161/cbt.24593>**

**<http://www.landesbioscience.com/journals/cbt/article/24593/>**

**Supplementary Figure 1.** KC numbers following GdCl<sub>3</sub> administration. Animals were administered GdCl<sub>3</sub> or saline (control) at day 0. KCs in the tumour-bearing liver were identified using the F4/80+ marker and quantified as the number of positively stained cells/mm<sup>2</sup> at days 3, 7 and 16 post-treatment. Results are expressed as mean values ± SEM. N=6 animals per group.

Supplementary Figure 1.

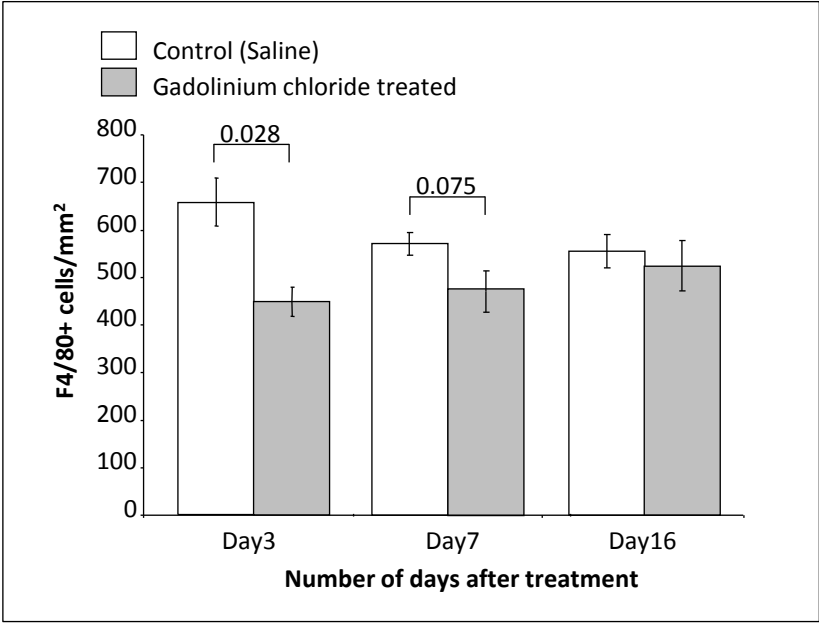

Supplement: cbt-14-606-s01.pdf [file cbt-14-606-s01.pdf]
